# Supplementary material for: De novo sequencing and comparative transcriptome analysis of the male and hermaphroditic flowers provide insights into the regulation of flower formation in andromonoecious taihangia rupestris
Source: PubMed Central journal article supplement (PMC5329940; doi:10.1186/s12870-017-0990-x), 2017-02-28
Supplement: 12870_2017_990_MOESM1_ESM.pdf [file 12870_2017_990_MOESM1_ESM.pdf]

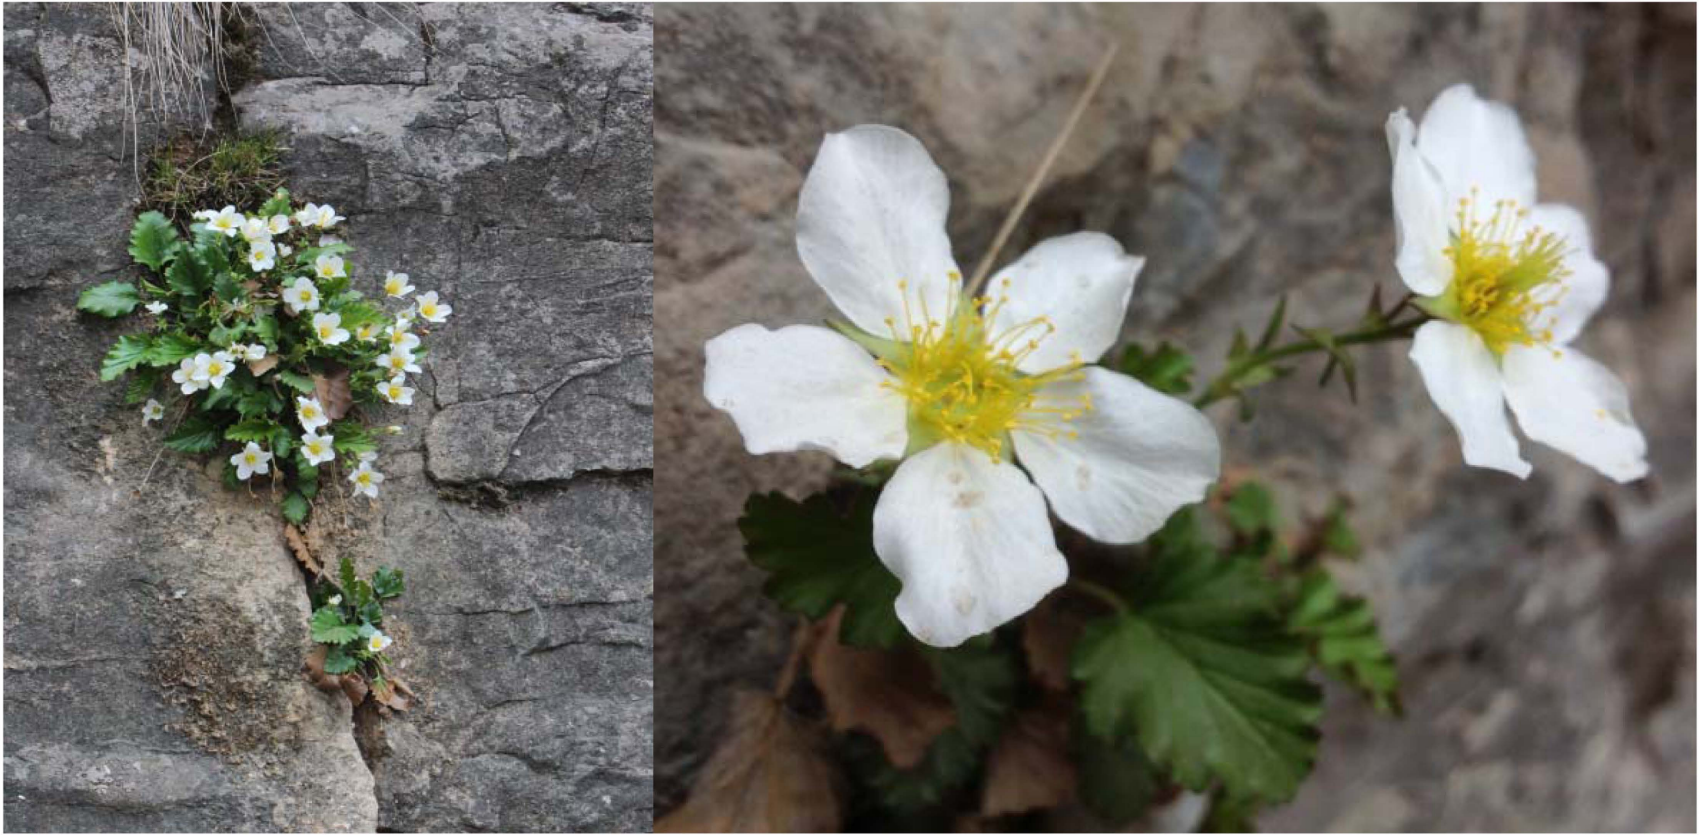

Figure S1. Male and hermaphroditic flowers within andromonoecious *Taihangia* on the cliff face.
