# Supplementary material for: De novo sequencing and comparative transcriptome analysis of the male and hermaphroditic flowers provide insights into the regulation of flower formation in andromonoecious taihangia rupestris
Source: PubMed Central journal article supplement (PMC5329940; doi:10.1186/s12870-017-0990-x), 2017-02-28
Supplement: 12870_2017_990_MOESM5_ESM.pdf [file 12870_2017_990_MOESM5_ESM.pdf]

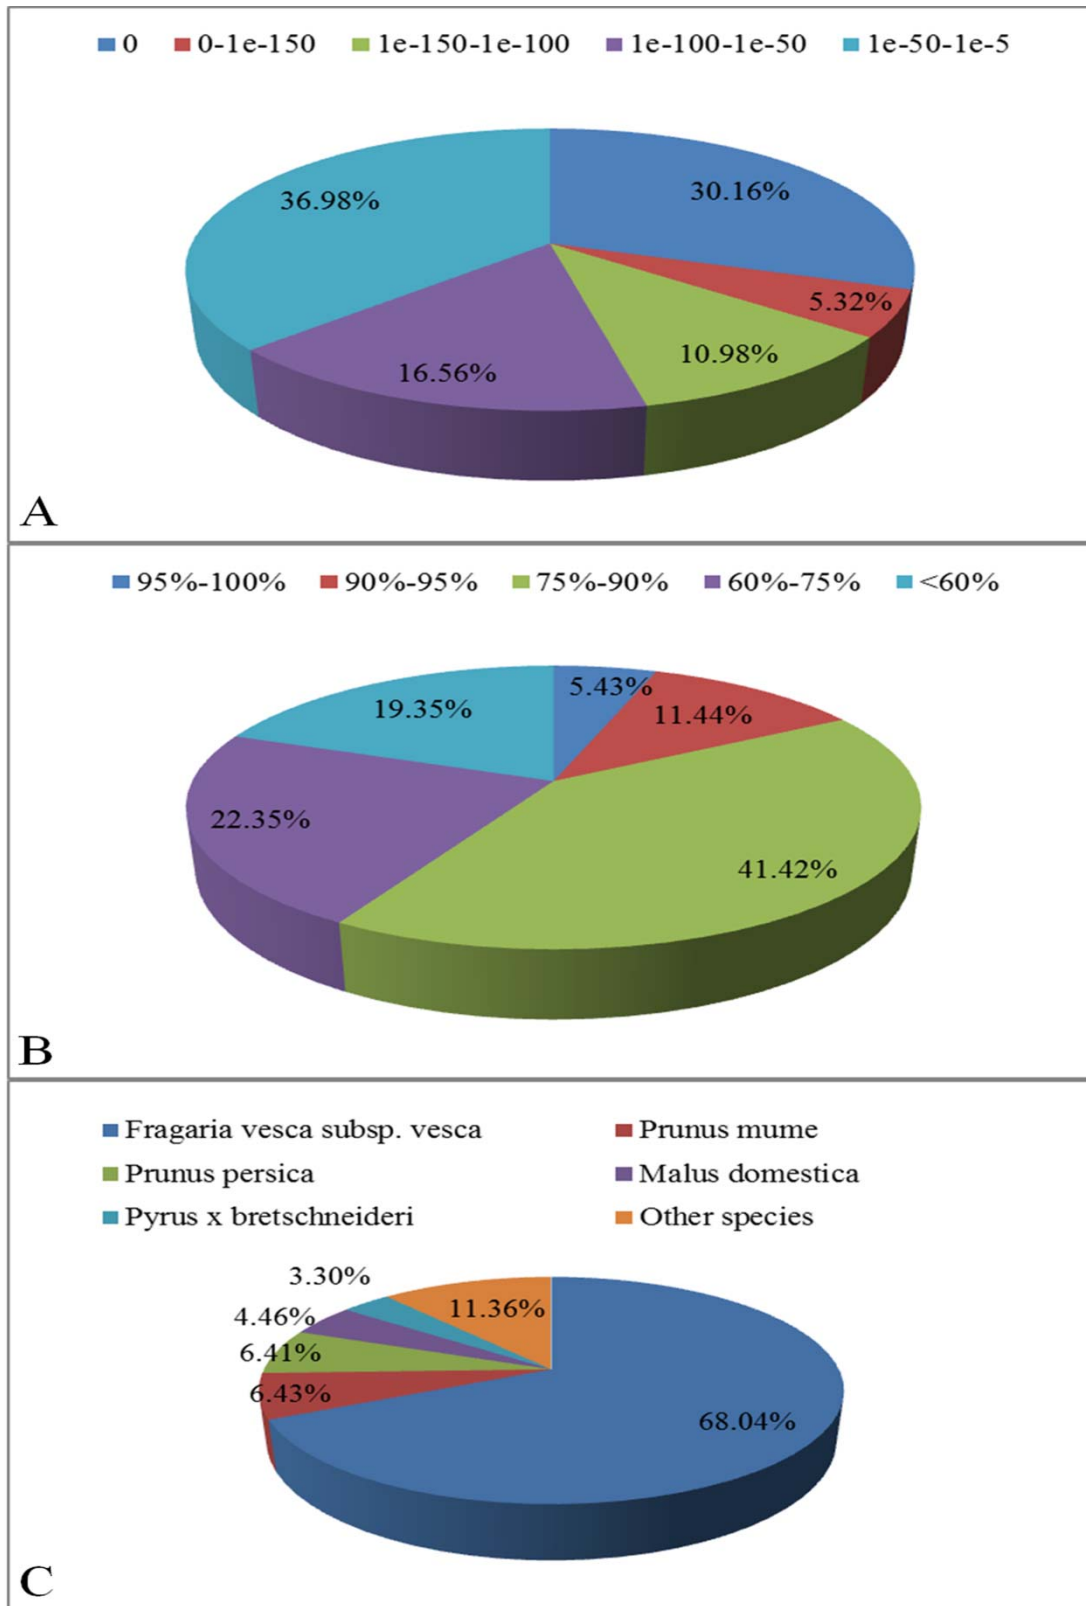

Figure S3. Characteristics of homology search of Taihangia unigenes against the NR database. The cutoff value was set at  $1e-5$ . (A) e value distribution of the top Blast hits for each unigene; (B) Similarity of the best Blast hits for each unigene; (C) Species distribution of the top Blast hits.
